# Supplementary material for: Study on the Multitarget Synergistic Effects of Kai-Xin-San against Alzheimer’s Disease Based on Systems Biology
Source: Hindawi journal article supplement (doi:10.1155/2019/1707218), 2019-12-31
Supplement: f1 [file 1707218.f1.pdf]

## 1 Supplementary Material

2

3 The HPLC-QTOF MS was applied to establish a method for semi-quantitative analysis of  
4 components into plasma and brain of AD rats. Data processing methods, such as multiple  
5 product ions filtering technique and neutral loss filtering technique, were adopted, and the  
6 components were assigned by formula disassembly. The peak areas of components after oral  
7 administration of KXS were listed in Table S1 and Table S2.

8

9 **Table S1:** The peak area of components in rat plasma after oral administration of KXS in AD  
10 rats at different blood sampling time points.

| No. | Formula                                         | Source | Area (30 min) | Area (1 h) | Area (2 h) |
|-----|-------------------------------------------------|--------|---------------|------------|------------|
| 1   | C <sub>10</sub> H <sub>12</sub> O <sub>5</sub>  | KXS    | 1823          | 5195       | 1837       |
| 2   | C <sub>12</sub> H <sub>14</sub> O <sub>5</sub>  | KXS    | 421           | 177        | ND         |
| 3   | C <sub>12</sub> H <sub>16</sub> O <sub>4</sub>  | KXS    | 174           | 230        | 135        |
| 4   | C <sub>12</sub> H <sub>16</sub> O <sub>4</sub>  | KXS    | 104           | 57         | 23         |
| 5   | C <sub>12</sub> H <sub>16</sub> O <sub>5</sub>  | KXS    | 744           | 397        | 265        |
| 6   | C <sub>12</sub> H <sub>16</sub> O <sub>5</sub>  | KXS    | 350           | 384        | 154        |
| 7   | C <sub>16</sub> H <sub>20</sub> O <sub>9</sub>  | KXS    | 560           | 316        | 243        |
| 8   | C <sub>21</sub> H <sub>24</sub> O <sub>11</sub> | KXS    | 926           | 1812       | 526        |
| 9   | C <sub>22</sub> H <sub>30</sub> O <sub>14</sub> | KXS    | 33            | 181        | ND         |
| 10  | C <sub>36</sub> H <sub>46</sub> O <sub>7</sub>  | KXS    | 718           | 297        | 197        |
| 11  | C <sub>36</sub> H <sub>56</sub> O <sub>13</sub> | KXS    | 135           | ND         | ND         |
| 12  | C <sub>36</sub> H <sub>60</sub> O <sub>8</sub>  | KXS    | ND            | 50         | ND         |
| 13  | C <sub>36</sub> H <sub>62</sub> O <sub>10</sub> | KXS    | 1307          | 329        | ND         |
| 14  | C <sub>41</sub> H <sub>70</sub> O <sub>13</sub> | KXS    | ND            | 527        | ND         |
| 15  | C <sub>41</sub> H <sub>70</sub> O <sub>14</sub> | KXS    | 212           | 98         | 76         |
| 16  | C <sub>42</sub> H <sub>72</sub> O <sub>14</sub> | KXS    | 677           | 188        | 162        |
| 17  | C <sub>47</sub> H <sub>80</sub> O <sub>17</sub> | KXS    | ND            | 110        | ND         |
| 18  | C <sub>48</sub> H <sub>82</sub> O <sub>18</sub> | KXS    | 125           | 146        | 101        |
| 19  | C <sub>48</sub> H <sub>82</sub> O <sub>18</sub> | KXS    | 110           | 102        | 98         |
| 20  | C <sub>53</sub> H <sub>90</sub> O <sub>22</sub> | KXS    | 64            | 103        | 145        |
| 21  | C <sub>54</sub> H <sub>92</sub> O <sub>23</sub> | KXS    | ND            | 34         | ND         |
| 22  | C <sub>54</sub> H <sub>92</sub> O <sub>23</sub> | KXS    | 605           | 1651       | 1614       |

|    |                      |     |      |      |      |
|----|----------------------|-----|------|------|------|
| 23 | $C_{54}H_{92}O_{23}$ | KXS | 52   | 54   | 65   |
| 1  | $C_{16}H_{20}O_9$    | GR  | 547  | 185  | ND   |
| 2  | $C_{36}H_{62}O_{10}$ | GR  | 323  | 159  | 159  |
| 3  | $C_{41}H_{70}O_{14}$ | GR  | 275  | 334  | ND   |
| 4  | $C_{47}H_{80}O_{17}$ | GR  | ND   | 98   | ND   |
| 5  | $C_{48}H_{82}O_{18}$ | GR  | 73   | 43   | 77   |
| 6  | $C_{48}H_{82}O_{18}$ | GR  | 48   | ND   | ND   |
| 7  | $C_{53}H_{90}O_{22}$ | GR  | 64   | 33   | 143  |
| 8  | $C_{54}H_{92}O_{23}$ | GR  | 650  | 368  | 308  |
| 1  | $C_{12}H_{16}O_4$    | PR  | 113  | 149  | 149  |
| 1  | $C_{12}H_{16}O_5$    | PO  | 515  | 342  | 120  |
| 2  | $C_{21}H_{24}O_{11}$ | PO  | 1182 | 788  | 447  |
| 3  | $C_{36}H_{46}O_7$    | PO  | 907  | 400  | 244  |
| 4  | $C_{42}H_{72}O_{14}$ | PO  | ND   | 195  | ND   |
| 1  | $C_{10}H_{12}O_5$    | AT  | 2547 | 2905 | 2547 |
| 2  | $C_{12}H_{14}O_5$    | AT  | 409  | 124  | 409  |
| 3  | $C_{12}H_{16}O_4$    | AT  | 1022 | 78   | 1022 |
| 4  | $C_{12}H_{16}O_5$    | AT  | 425  | 304  | 425  |
| 5  | $C_{22}H_{30}O_{14}$ | AT  | 24   | 24   | 24   |
| 6  | $C_{36}H_{56}O_{13}$ | AT  | 247  | 85   | 247  |

11  
12  
13  
14  
15  
16  
17  
18  
19  
20  
21  
22  
23  
24

---

ND: not detected

25  
26  
27

**Table S2:** The peak area of components in rat brain after oral administration of KXS in AD rats.

| No. | Formula                                         | t <sub>R</sub> (min) | Source | Area (1 h) |
|-----|-------------------------------------------------|----------------------|--------|------------|
| 1   | C <sub>12</sub> H <sub>16</sub> O <sub>4</sub>  | 20.6                 | KXS    | 63         |
| 2   | C <sub>12</sub> H <sub>16</sub> O <sub>4</sub>  | 28.18                | KXS    | 220        |
| 3   | C <sub>12</sub> H <sub>16</sub> O <sub>5</sub>  | 20.27                | KXS    | 261        |
| 4   | C <sub>12</sub> H <sub>16</sub> O <sub>5</sub>  | 40.76                | KXS    | 207        |
| 5   | C <sub>16</sub> H <sub>20</sub> O <sub>9</sub>  | 37.93                | KXS    | 140        |
| 6   | C <sub>21</sub> H <sub>24</sub> O <sub>11</sub> | 9.75                 | KXS    | 134        |
| 7   | C <sub>21</sub> H <sub>24</sub> O <sub>11</sub> | 40.3                 | KXS    | 360        |
| 8   | C <sub>36</sub> H <sub>46</sub> O <sub>7</sub>  | 28.07                | KXS    | 613        |
| 9   | C <sub>36</sub> H <sub>46</sub> O <sub>7</sub>  | 45.93                | KXS    | 757        |
| 10  | C <sub>42</sub> H <sub>72</sub> O <sub>13</sub> | 40.26                | KXS    | 25         |
| 1   | C <sub>12</sub> H <sub>16</sub> O <sub>5</sub>  | 40.79                | GR     | 162        |
| 2   | C <sub>21</sub> H <sub>24</sub> O <sub>11</sub> | 40.32                | GR     | 397        |
| 3   | C <sub>36</sub> H <sub>46</sub> O <sub>7</sub>  | 28.12                | GR     | 801        |
| 4   | C <sub>36</sub> H <sub>46</sub> O <sub>7</sub>  | 45.99                | GR     | 620        |

28
